# Supplementary material for: Tunable electronic structures in MPX3 (M = Zn, Cd; X = S, Se) monolayers by strain engineering
Source: Royal Society of Chemistry journal article supplement (doi:10.1039/c6ra14101c), 2016-01-01
Supplement: c6ra14101c1.pdf [file c6ra14101c1.pdf]

Supplementary Information

## Tunable electronic structures in $MPX_3$ ( $M = Zn, Cd$ ; $X = S, Se$ ) monolayers by strain engineering

Hui Xiang<sup>a</sup>, Bo Xu<sup>\*, a</sup>, Yidong Xia<sup>a</sup>, Jiang Yin<sup>\*, a, b</sup>, Zhiguo Liu<sup>a, b</sup>

<sup>a</sup> National Laboratory of Solid State Microstructures and Department of Materials Science and Engineering, Nanjing University, Nanjing, 210093, China

<sup>b</sup> Collaborative Innovation Center of Advanced Microstructures, Nanjing University, Nanjing, 210093, China

\*Corresponding Author: [xubonju@gmail.com](mailto:xubonju@gmail.com) and [jyin@nju.edu.cn](mailto:jyin@nju.edu.cn).

**Table S1** Fractional atomic coordinates of optimized  $MPX_3$  ( $M = Zn, Cd$ ;  $X = S, Se$ ).

(a)  $ZnPS_3$

| atoms | $a = b = 6.011 \text{ \AA}, c = 20 \text{ \AA}; \alpha = \beta = 0, \gamma = 120^\circ$ |                    |                    |
|-------|-----------------------------------------------------------------------------------------|--------------------|--------------------|
| Zn    | 0.0000000000000000                                                                      | 0.0000000000000000 | 0.4846545449292046 |
| Zn    | 0.6666666666666667                                                                      | 0.3333333333333333 | 0.4850448430707976 |
| P     | 0.3333333333333333                                                                      | 0.6666666666666667 | 0.4295803052753951 |
| P     | 0.3333333333333333                                                                      | 0.6666666666666667 | 0.5401190837246037 |
| S     | 0.3335097355927447                                                                      | 0.9955908975003060 | 0.4040053479529391 |
| S     | 0.0044091024996939                                                                      | 0.3379188447681581 | 0.4040053479529391 |
| S     | 0.6620811552318420                                                                      | 0.6664902577315357 | 0.4040053479529391 |
| S     | 0.3331569243982000                                                                      | 0.3377424358330295 | 0.5656940409544120 |
| S     | 0.6622575641669703                                                                      | 0.9954144885651777 | 0.5656940409544120 |
| S     | 0.0045855114348224                                                                      | 0.6668430756018000 | 0.5656940409544120 |

(b)  $ZnPSe_3$

| atoms | $a = b = 6.357 \text{ \AA}, c = 20 \text{ \AA}; \alpha = \beta = 0, \gamma = 120^\circ$ |                    |                    |
|-------|-----------------------------------------------------------------------------------------|--------------------|--------------------|
| Zn    | 0.0000000000000000                                                                      | 0.0000000000000000 | 0.4850713578594509 |
| Zn    | 0.6666666666666667                                                                      | 0.3333333333333333 | 0.4846280301405513 |
| P     | 0.3333333333333333                                                                      | 0.6666666666666667 | 0.4288297908057675 |
| P     | 0.3333333333333333                                                                      | 0.6666666666666667 | 0.5408695981942314 |
| Se    | 0.3328026193757395                                                                      | 0.0033116235479310 | 0.4000175915059568 |
| Se    | 0.9966883764520691                                                                      | 0.3294910025035210 | 0.4000175915059568 |
| Se    | 0.6705089974964790                                                                      | 0.6671973739485408 | 0.4000175915059568 |
| Se    | 0.3338640406152052                                                                      | 0.3300217097854047 | 0.5696817974013944 |
| Se    | 0.6699782902145952                                                                      | 0.0038423308298147 | 0.5696817974013944 |
| Se    | 0.9961576691701853                                                                      | 0.6661359593847949 | 0.5696817974013944 |

(c) CdPS<sub>3</sub>

| atoms | $a = b = 6.300 \text{ \AA}, c = 20 \text{ \AA}; \alpha = \beta = 0, \gamma = 120^\circ$ |                    |                    |
|-------|-----------------------------------------------------------------------------------------|--------------------|--------------------|
| Cd    | 0.0000000000000000                                                                      | 0.0000000000000000 | 0.4852030932124268 |
| Cd    | 0.6666666666666667                                                                      | 0.3333333333333333 | 0.4844962947875754 |
| P     | 0.3333333333333333                                                                      | 0.6666666666666667 | 0.4284349885625087 |
| P     | 0.3333333333333333                                                                      | 0.6666666666666667 | 0.5412644004374902 |
| S     | 0.3326275765813610                                                                      | 0.9771789019852107 | 0.3995776472129590 |
| S     | 0.0228210980147894                                                                      | 0.3554486812718628 | 0.3995776472129590 |
| S     | 0.6445513187281372                                                                      | 0.6673724167429195 | 0.3995776472129590 |
| S     | 0.3340390834095838                                                                      | 0.3561544313481252 | 0.5701217416943923 |
| S     | 0.6438455686518750                                                                      | 0.9778846520614729 | 0.5701217416943923 |
| S     | 0.0221153479385271                                                                      | 0.6659609165904162 | 0.5701217416943923 |

(d) CdPSe<sub>3</sub>

| atoms | $a = b = 6.618 \text{ \AA}, c = 20 \text{ \AA}; \alpha = \beta = 0, \gamma = 120^\circ$ |                    |                    |
|-------|-----------------------------------------------------------------------------------------|--------------------|--------------------|
| Cd    | 0.0000000000000000                                                                      | 0.0000000000000000 | 0.4852089136771441 |
| Cd    | 0.6666666666666667                                                                      | 0.3333333333333333 | 0.4844904743228581 |

|    |                    |                    |                    |
|----|--------------------|--------------------|--------------------|
| P  | 0.3333333333333333 | 0.6666666666666667 | 0.4277471860140425 |
| P  | 0.3333333333333333 | 0.6666666666666667 | 0.5419522029859563 |
| Se | 0.3325285778994166 | 0.9861077254493626 | 0.3952513264221017 |
| Se | 0.0138922745506374 | 0.3464208591257664 | 0.3952513264221017 |
| Se | 0.6535791408742335 | 0.6674714154248639 | 0.3952513264221017 |
| Se | 0.3341380820915281 | 0.3472256078839731 | 0.5744480624852494 |
| Se | 0.6527743921160269 | 0.9869124742075692 | 0.5744480624852494 |
| Se | 0.0130875257924307 | 0.6658619179084718 | 0.5744480624852494 |

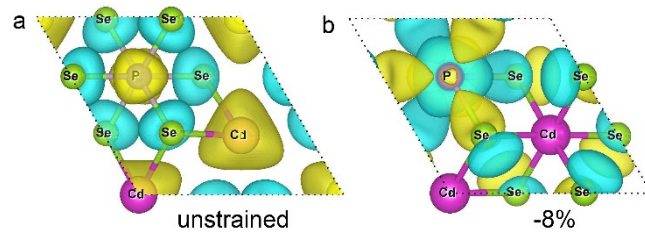

**Figure S1** Spatial distributions of wave functions for the bottom of CBM of CdPSe<sub>3</sub>. (a) unstrained state, and (b) compressive strain at 8%.

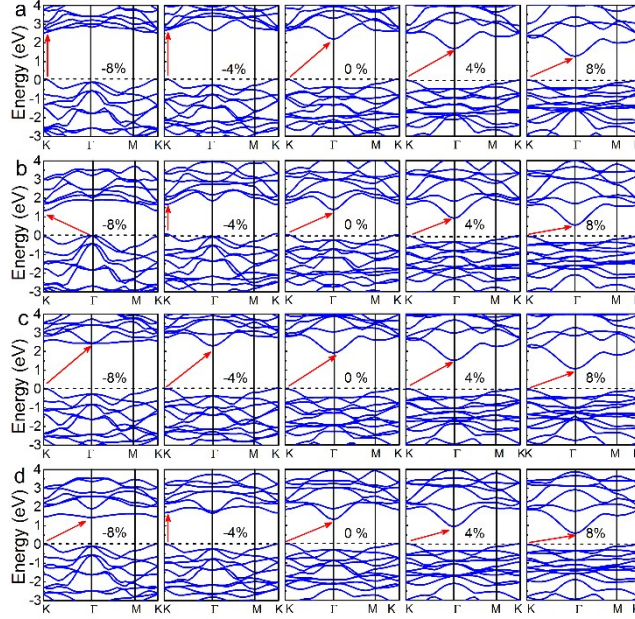

**Figure S2** The evolution of band structures calculated by PBE functional under biaxial strain -8%, -4%, 0, 4%, and 8%, where the label from (a) to (d) represents ZnPS<sub>3</sub> (a), ZnPSe<sub>3</sub> (b), CdPS<sub>3</sub> (c), and CdPSe<sub>3</sub> (d), respectively. Red arrows represent the direction of band gap from the VBM to the CBM. The Fermi level is set to zero.

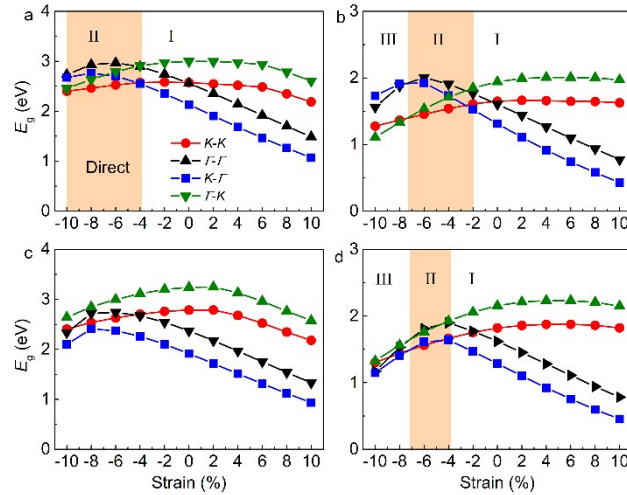

**Figure S3** The change of energy gaps of (a) ZnPS<sub>3</sub>, (b) ZnPSe<sub>3</sub>, (c) CdPS<sub>3</sub> and (d) CdPSe<sub>3</sub> by PBE functional, including  $\Gamma \rightarrow \Gamma$  (black),  $K \rightarrow K$  (red),  $K \rightarrow \Gamma$  (blue), and  $\Gamma \rightarrow K$  (green), where the region of I, II, and III represents the indirect, direct, and indirect band gap, respectively.
